# Supplementary material for: Insights into DNA hydroxymethylation in the honeybee from in-depth analyses of TET dioxygenase
Source: PubMed Central journal article supplement (PMC4150289; doi:10.1098/rsob.140110), 2014-08-06
Supplement: rsob140110supp1.pdf [file rsob140110supp1.pdf]

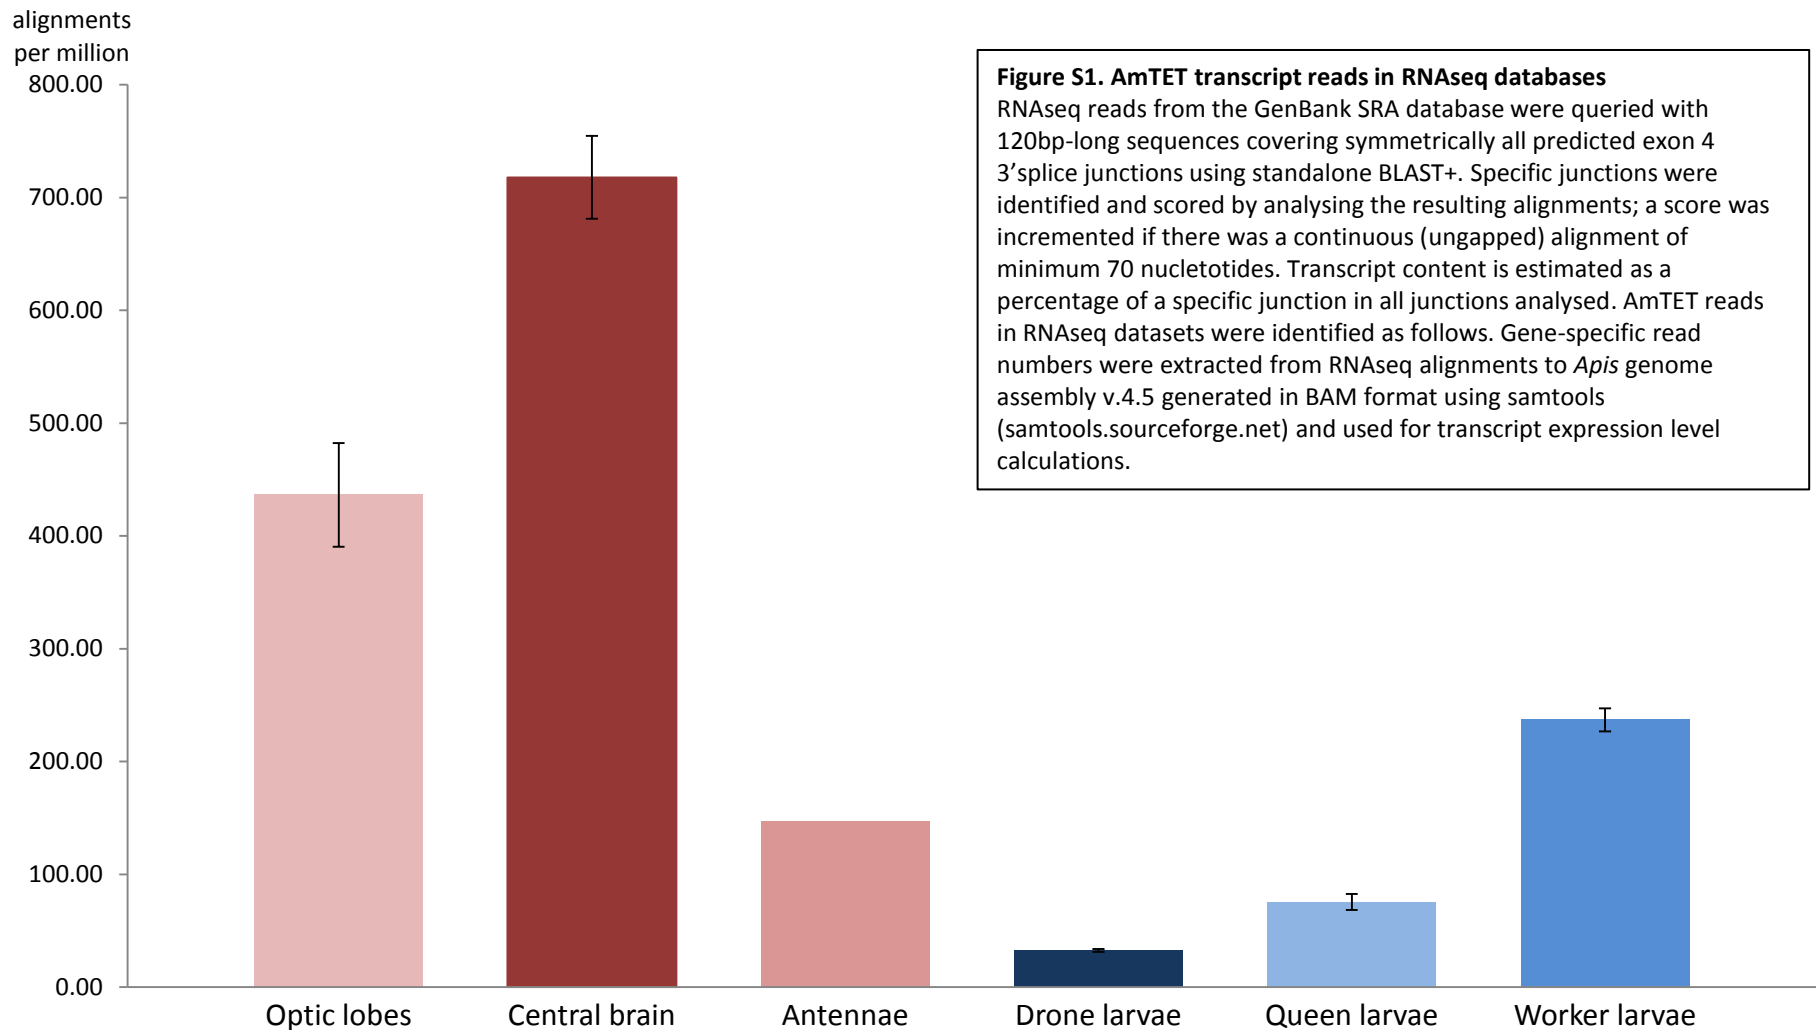

| AmTET GB52555                                        | Optic lobes | Central brain | Antennae | Drone larvae | Queen larvae | Worker larvae |
|------------------------------------------------------|-------------|---------------|----------|--------------|--------------|---------------|
| apm                                                  | 436.40      | 717.92        | 147.10   | 32.41        | 75.44        | 236.81        |
| stdev                                                | 45.87       | 36.75         | nd       | 1.24         | 7.20         | 10.20         |
| N                                                    | 4           | 4             | 1        | 5            | 5            | 5             |
| apm= alignments per million                          |             |               |          |              |              |               |
| stdev =standard deviation; N = number of experiments |             |               |          |              |              |               |
