# Supplementary material for: Insights into DNA hydroxymethylation in the honeybee from in-depth analyses of TET dioxygenase
Source: PubMed Central journal article supplement (PMC4150289; doi:10.1098/rsob.140110), 2014-08-06
Supplement: rsob140110supp2.pdf [file rsob140110supp2.pdf]

**Figure S2. AmTET and AmDNMTs transcripts levels in RNA seq datasets.**  
See legend to figure S1 for more details

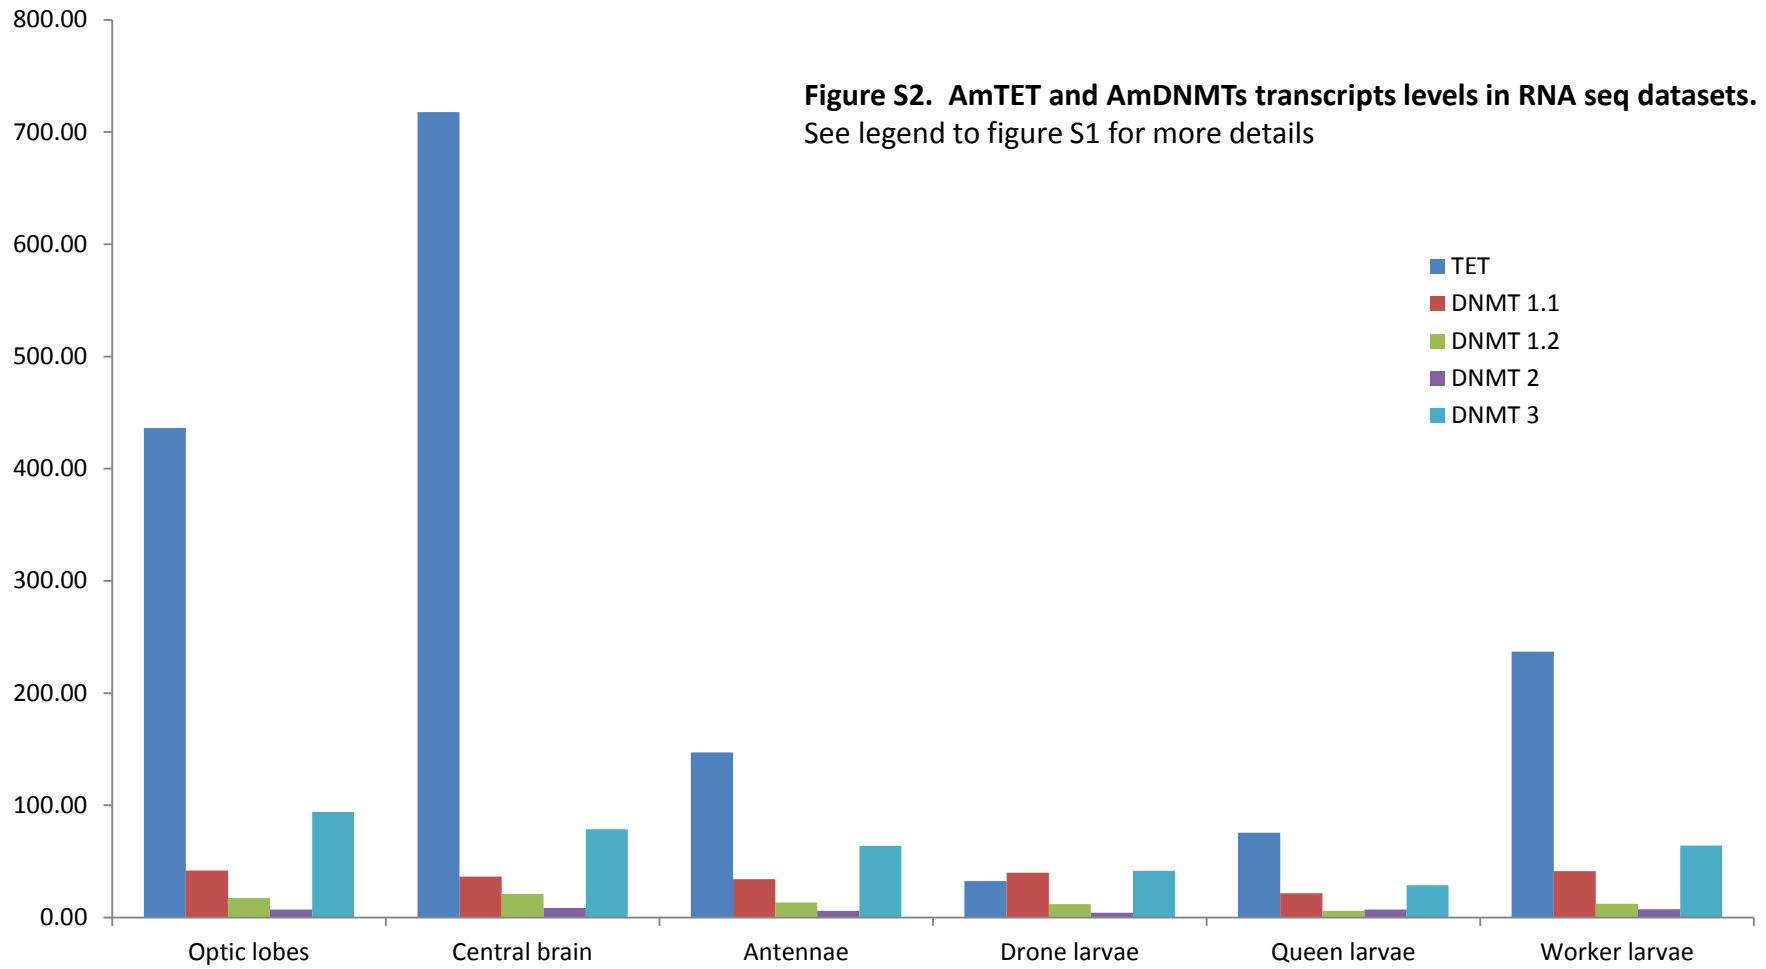

| apm     | Optic lobes | Central brain | Antennae | Drone larvae | Queen larvae | Worker larvae |
|---------|-------------|---------------|----------|--------------|--------------|---------------|
| TET     | 436.40      | 717.92        | 147.10   | 32.41        | 75.44        | 236.81        |
| Dnmt1.1 | 41.81       | 36.57         | 34.28    | 39.88        | 21.66        | 41.36         |
| Dnmt1a  | 17.39       | 21.09         | 13.38    | 12.03        | 5.80         | 12.21         |
| Dnmt2   | 7.02        | 8.51          | 5.87     | 4.31         | 7.06         | 7.31          |
| Dnmt3   | 94.04       | 78.65         | 63.97    | 41.57        | 28.66        | 63.99         |

| STDEV   | Optic lobes | Central brain | Antennae | Drone larvae | Queen larvae | Worker larvae |
|---------|-------------|---------------|----------|--------------|--------------|---------------|
| TET     | 45.87       | 36.75         | nd       | 1.24         | 7.20         | 10.20         |
| Dnmt1.1 | 6.28        | 5.05          | nd       | 2.85         | 1.83         | 3.94          |
| Dnmt1a  | 3.41        | 3.14          | nd       | 1.04         | 0.65         | 1.87          |
| Dnmt2   | 2.15        | 1.18          | nd       | 1.34         | 1.59         | 1.64          |
| Dnmt3   | 4.77        | 4.01          | nd       | 2.72         | 2.40         | 4.61          |
| N       | 4           | 4             | 1        | 5            | 5            | 5             |
