# Supplementary material for: Insights into DNA hydroxymethylation in the honeybee from in-depth analyses of TET dioxygenase
Source: PubMed Central journal article supplement (PMC4150289; doi:10.1098/rsob.140110), 2014-08-06

**Figure S3.** qPCR analysis of AmTET and AMDNMT3 expression in various honey bee samples. See material and methods for more details.

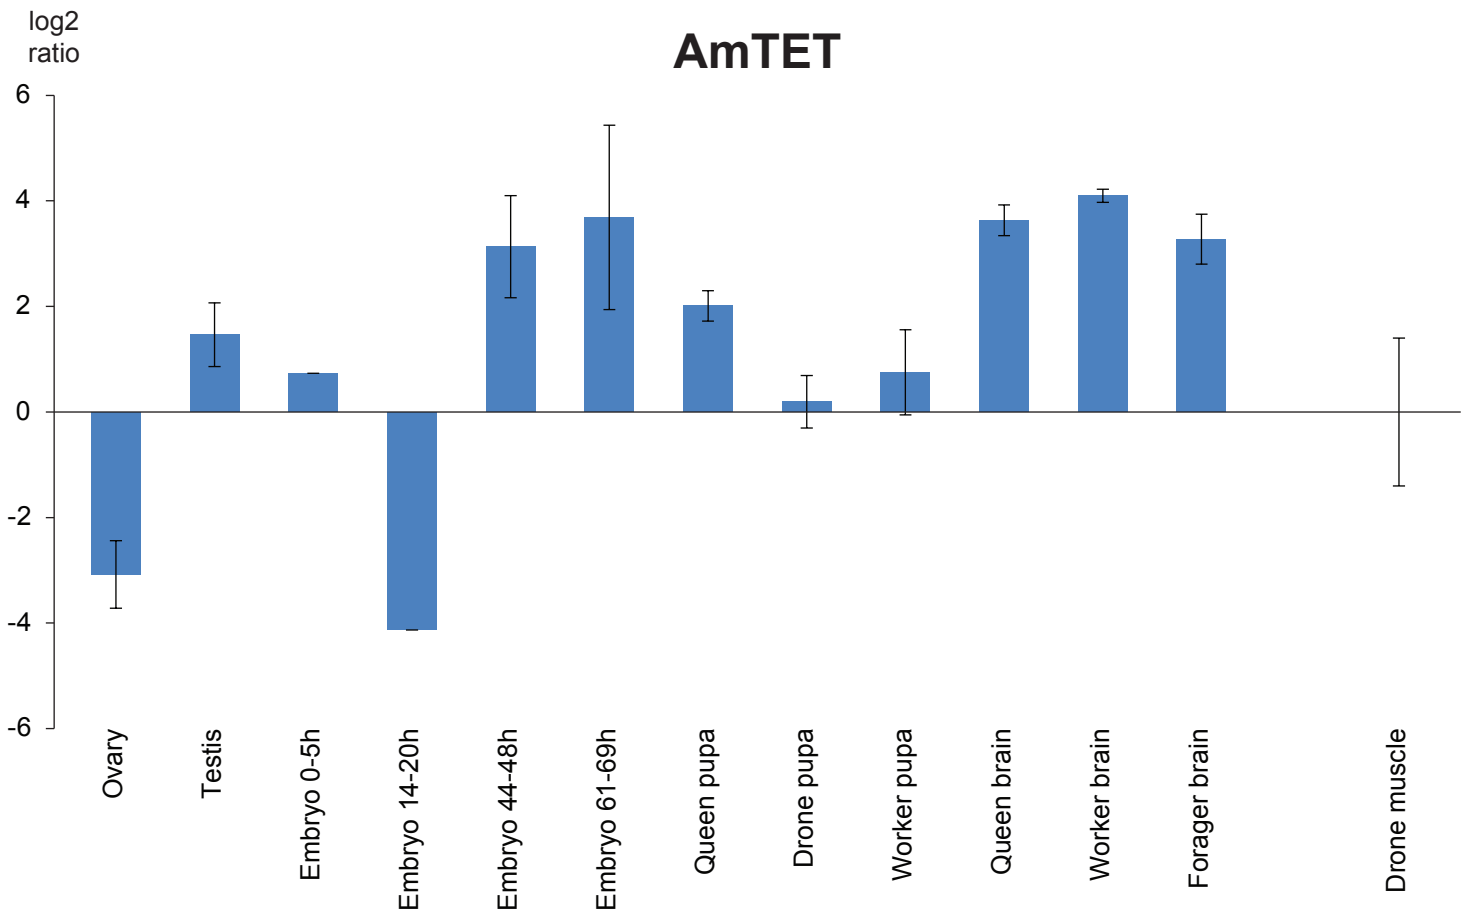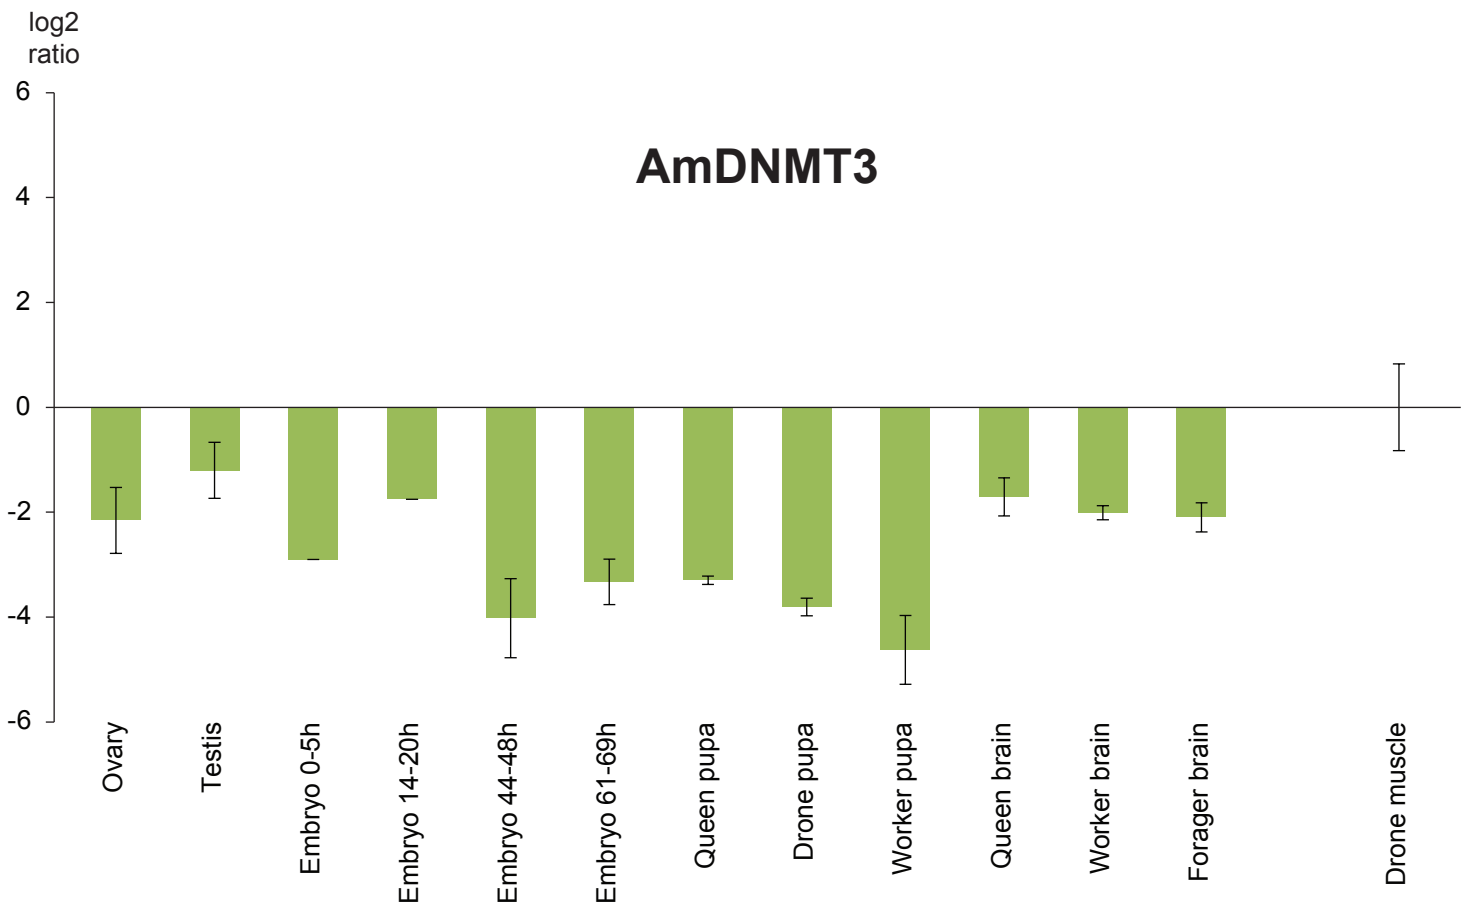

Supplement: rsob140110supp3.pdf [file rsob140110supp3.pdf]
