# Supplementary material for: Insights into DNA hydroxymethylation in the honeybee from in-depth analyses of TET dioxygenase
Source: PubMed Central journal article supplement (PMC4150289; doi:10.1098/rsob.140110), 2014-08-06
Supplement: rsob140110supp4.pdf [file rsob140110supp4.pdf]

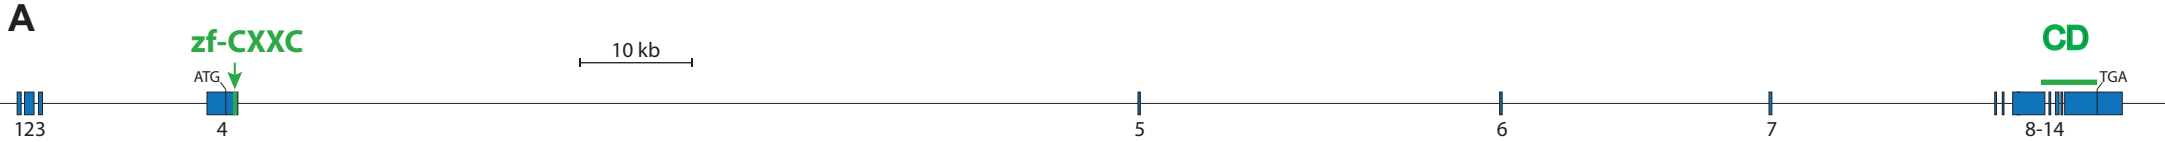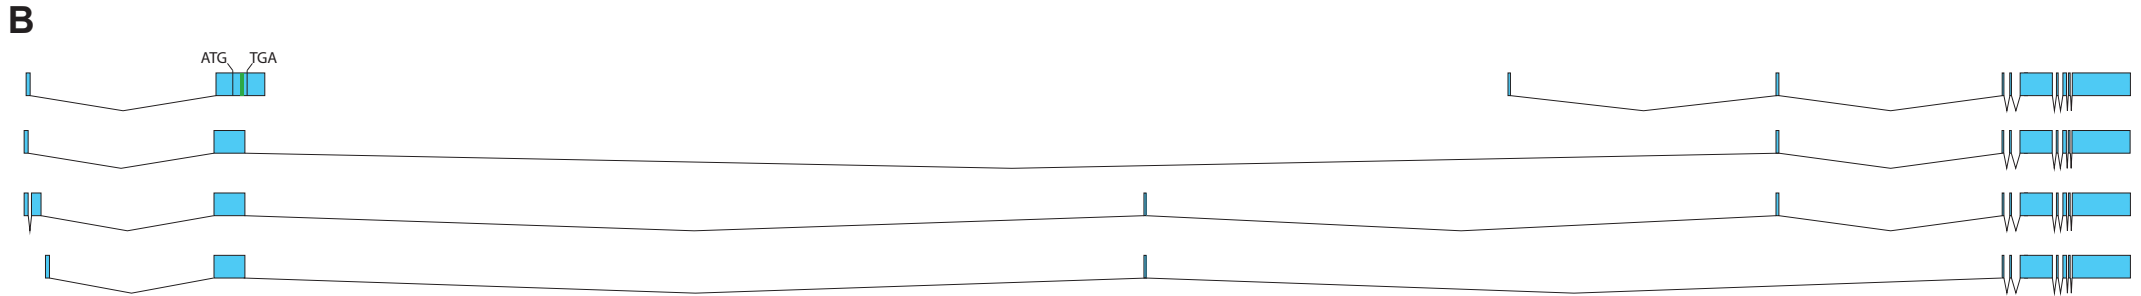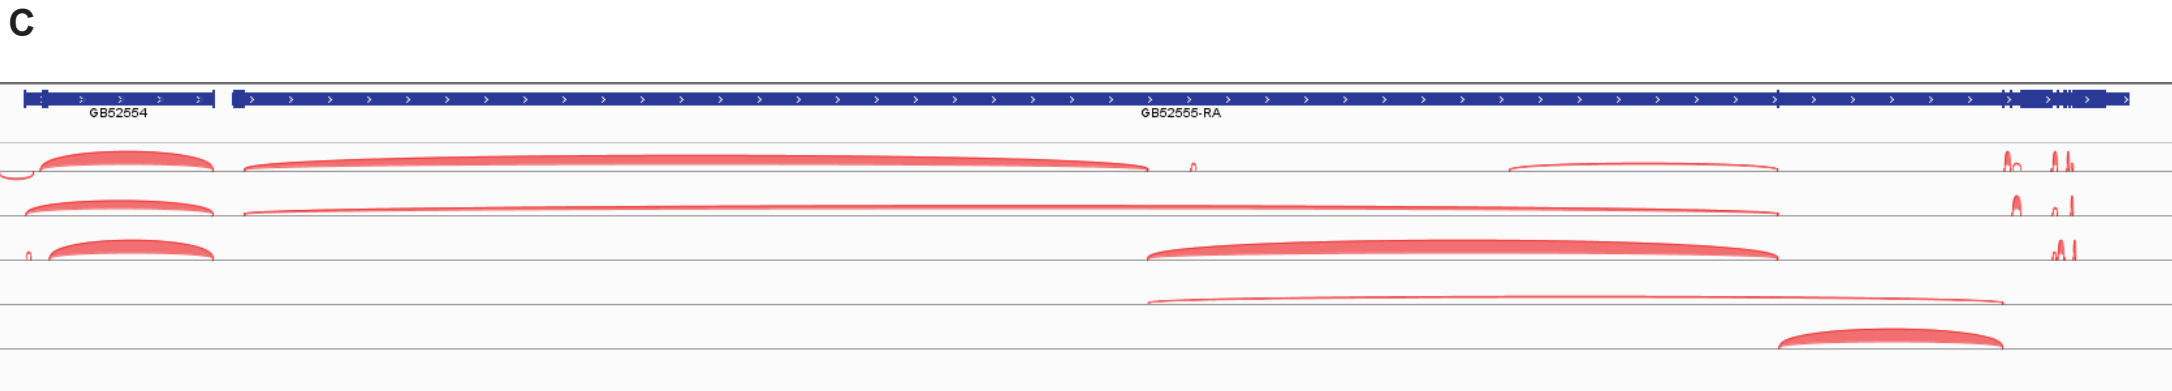

**Figure S4**

A. AmTET gene model showing all detected exons, zf-CXXC: DNA binding domain; CD: catalytic domain

B. Transcript models based on RNAseq data

C. Spliced junctions (RNA-seq/tophat). Integrative Genomics Viewer (IGV) visualisation of splice junctions in a typical RNA-seq sample from brains identified via tophat/cufflinks reads analysis pipeline ([www.broadinstitute.org/igv/](http://www.broadinstitute.org/igv/)). References: Thorvaldsdóttir et al.(2013)Integrative Genomics Viewer (IGV): high-performance genomics data visualization and exploration. *Brief Bioinform.* 14: 178-192, and Robinson et al (2011)Integrative Genomics Viewer. *Nature Biotech.* 29:24–26.
